## Glycogen-dependent demixing of frog egg cytoplasm at increased crowding

James F. Pelletier<sup>1,2</sup>, Christine M. Field<sup>1,2</sup>, Margaret Coughlin<sup>1</sup>, Lillia Ryazanova<sup>3,4</sup>, Matthew Sonnett<sup>1,3,4</sup>, Martin Wühr<sup>3,4</sup>, Timothy J. Mitchison<sup>1,2</sup>

<sup>1</sup>Department of Systems Biology, Harvard Medical School, Boston, MA, USA

<sup>2</sup>Marine Biological Laboratory, Woods Hole, MA, USA

<sup>3</sup>Department of Molecular Biology, Princeton University, Princeton, NJ, USA

<sup>4</sup>Lewis-Sigler Institute for Integrative Genomics, Princeton University, Princeton, NJ, USA

### Abstract

1 Crowding increases the tendency of macromolecules to aggregate and phase separate, and high crowding  
2 can induce glass-like states of cytoplasm. To explore the effect of crowding in a well-characterized model  
3 cytoplasm we developed methods to selectively concentrate components larger than 25 kDa from  
4 *Xenopus* egg extracts. When crowding was increased 1.4x, the egg cytoplasm demixed into two liquid  
5 phases of approximately equal volume. One of the phases was highly enriched in glycogen while the other  
6 had a higher protein concentration. Glycogen hydrolysis blocked or reversed demixing. Quantitative  
7 proteomics showed that the glycogen phase was enriched in proteins that bind glycogen, participate in  
8 carbohydrate metabolism, or are in complexes with especially high native molecular weight. The glycogen  
9 phase was depleted of ribosomes, ER and mitochondria. These results inform on the physical nature of a  
10 glycogen-rich cytoplasm and suggest a role of demixing in the localization of glycogen particles in tissue  
11 cells.

## Introduction

12 The concentration of macromolecules in cytoplasm is thought to reflect a balance between competing  
13 evolutionary pressures. Broadly speaking, increased concentrations tend to speed up biochemistry, but  
14 very high concentrations can cause excessive crowding, leading to deleterious interactions and potentially  
15 freezing of biochemistry that depends on dissociation reactions of macromolecules. In more precise  
16 terms, reaction-limited reaction rates increase with crowding due to increased re-collision frequency of  
17 reactants (Kim and Yethiraj, 2009). At the same time, diffusion-limited reaction rates increase with  
18 concentration but decrease with viscosity, and viscosity increases with concentration (Dill et al., 2011; van  
19 den Berg et al., 2017). Crowding tends to promote macromolecular assembly reactions, including linear  
20 polymerization and phase-separated condensate assembly (Andre and Spruijt, 2020). Increasing crowding  
21 may contribute to a liquid-to-glass transition in bacterial and yeast cytoplasm under energy stress (Joyner  
22 et al., 2016; Munder et al., 2016; Parry et al., 2014) or mechanical compression (Okumus et al., 2016).  
23 Whether this glass transition is a universal response to increased crowding is not known, though local  
24 dehydration was shown to decrease the mobility of macromolecules in human cells in tissue culture  
25 (Charras et al., 2009).

26  
27 The concept of crowding is related to those of excluded volume effects (Rivas and Minton, 2016) and  
28 colloid osmotic pressure (Mitchison, 2019). Importantly, the ability of a molecule to exert crowding  
29 effects, and the response of molecules to crowding, depend on their size. Cytoplasm is polydisperse and  
30 soluble biomolecules cover orders of magnitude in radius, spanning from water molecules to ribosomes  
31 and other large complexes. Increased crowding tends to preferentially affect larger molecules because  
32 they start to physically interact before smaller molecules (Hwang et al., 2016). This reduces the mobility  
33 of large molecules, such as ribosomes, at concentrations which still allow smaller molecules to move in  
34 the crevices between them (Delarue et al., 2018). One might expect increased crowding to induce  
35 demixing of the largest components while leaving smaller components free to diffuse; however, the effect  
36 of crowding on cytoplasm is complicated by binding reactions, which may cause smaller molecules to  
37 demix along with larger ones to which they bind.

38  
39 The storage polysaccharide glycogen is one of the most abundant macromolecules in many animal cells,  
40 on the order of 10% (w/w) in fed liver tissue (Dowler and Mottram, 1918; Prats et al., 2018); however, it  
41 is often forgotten in discussions of the structure and dynamics of cytoplasm. Glycogen is synthesized as a  
42 particle that consists of a highly branched, covalent polymer of glucose, usually initiated by polymerization

43 from the surface of the nucleation protein glycogenin (Prats et al., 2018). Glycogen particles can be of  
44 different sizes, with a diameter of ~20 nm typical (Ioan et al., 1999a, b). Glycogen particles are highly  
45 soluble in water, though they can form higher order assemblies (Nawaz et al., 2021; Prats et al., 2018).  
46 The cell biology and biophysics of glycogen have been little studied in recent years, though a recent report  
47 of the glycogen-binding proteome is relevant to this work (Stapleton et al., 2013; Stapleton et al., 2010).

48

49 *Xenopus* egg extracts provide a well-characterized model cytoplasm. They are prepared from eggs by  
50 centrifugal crushing with minimal dilution and maintain many of the biochemical and biophysical  
51 properties of native egg cytoplasm. Egg extracts contain ~80 mg/mL protein and ~80 mg/mL glycogen.  
52 The glycogen provides an energy store for the developing embryo and may also provide a crowding  
53 function that promotes assembly of nuclei (Hartl et al., 1994) and mitotic spindle poles (Groen et al.,  
54 2011). We set out to investigate the effect of changes in crowding on cytoskeleton dynamics in egg extract,  
55 but when we increased crowding by 1.4x or higher, we observed bulk demixing into two phases, which  
56 was unexpected. Here, we report that this demixing depends on glycogen and generates one phase that  
57 is highly glycogen-enriched. These observations probably do not model any normal egg biology, but they  
58 are informative concerning the physical properties of glycogen and its influence on those of the cytoplasm.

## Results

### 59 **Crowded *Xenopus* egg extracts exhibit liquid-liquid demixing**

60 We developed two methods to selectively increase macromolecular crowding of *Xenopus* egg extracts  
61 while minimally perturbing ionic strength, pH and metabolite concentrations. Both methods gave similar  
62 results. In the first method, dry Sephadex G-25 gel filtration resin was added directly to extract and then  
63 removed a few minutes later by centrifugal filtration. As the resin swells, it absorbs water and small  
64 molecules, but macromolecules greater than 25 kDa are excluded and therefore become more crowded  
65 (Fig 1A). This method was convenient for small volumes of extract. The crowding factor depended on the  
66 amount of dry resin added per volume extract (Figs 1B, S1). In the second method, a 30 kDa MWCO  
67 centrifugal filter unit was used to concentrate macromolecules greater than 30 kDa. This method was  
68 convenient for larger volumes. The crowding factor was measured by adding a macromolecular  
69 fluorescent probe, such as Streptavidin (53 kDa) fused to Alexa Fluor 647 (Fig 1C), then comparing the  
70 fluorescence intensity of a specimen of fixed depth before and after crowding by fluorescence microscopy  
71 with a low magnification objective (Fig S1).

72  
73 When crowding was increased to 1.2x, the extract remained similar in appearance to uncrowded extracts,  
74 as observed in brightfield and fluorescence images (Fig 1B,C). At 1.4x-1.5x, the extract underwent  
75 spontaneous demixing over a few minutes at both 0 °C and 20 °C. This unexpected phenomenon was  
76 further characterized. At 1.9x the extract appeared to precipitate, and this regime was not examined  
77 further. The phases formed throughout the sample and remained co-mingled in the tube. They had  
78 different densities and could be separated in bulk by centrifugation at 20000 rcf for 20 min. The volumes  
79 of the two phases after centrifugation were similar. The denser phase had a higher index of refraction of  
80 1.39, and the less dense phase had a lower index of refraction of 1.38. This refractive index difference  
81 made demixing easy to follow by phase contrast or DIC microscopy. Both phases exhibited all the  
82 hallmarks of liquids, including deformation under flow, splitting, fusion, and rounding towards a spherical  
83 shape driven by surface tension (Hyman et al., 2014) (Fig 1D, Video S1).

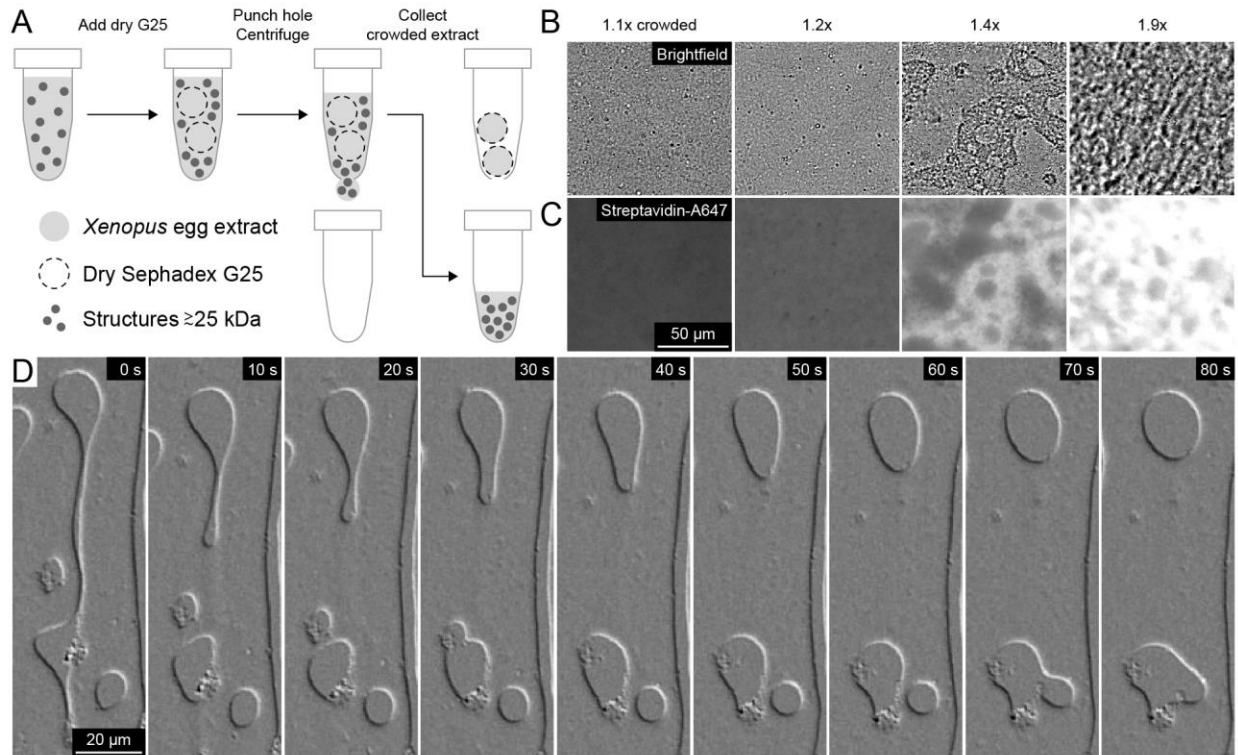

**Figure 1. Crowded *Xenopus* egg extracts exhibit liquid-liquid demixing.** (A) The macromolecular fraction greater than 25 kDa of *Xenopus* egg extracts was crowded by adding dry Sephadex G-25 resin, which selectively imbibes water and small molecules as it swells. (B) Brightfield images. Above 1.4x crowding, the extract remained liquid-like and exhibited patches with different light scattering properties. Above 1.9x crowding, precipitation occurred. (C) The crowding factor was estimated by quantification of fluorescence of a protein probe greater than 25 kDa added before crowding, in this case Streptavidin (53 kDa) fused to Alexa Fluor 647. The Streptavidin-A647 partitioned into one of the phases. Crowding factors estimated from lower magnification images in Fig S1. (D) Time lapse differential interference contrast (DIC) images of a 1.4x crowded extract confined between coverslips. The phases exhibited hallmarks of liquids, including deformation under flow, splitting, fusion, and rounding by surface tension. See Video S1.

## 84 **Role of glycogen in demixing**

85 The higher refractive index of the denser phase suggested non-equal distribution of glycogen, which has  
86 a higher density and refractive index than protein. We measured the glycogen concentration in  
87 unperturbed extract and the two phases using an assay that digested it to glucose for colorimetric  
88 quantification. Glycogen was highly enriched in the denser phase (Fig 2A). The glycogen concentration  
89 was 80 mg/mL in uncrowded crude extracts, 20 mg/mL in the less dense phase, and 250 mg/mL in the  
90 denser phase (Fig 2A) (Methods). Total protein was slightly enriched in the less dense phase (Fig 2B).

91  
92 To test for a role of glycogen in demixing, we hydrolyzed it using the enzyme amyloglucosidase (AG)  
93 (Methods). Glycogen digestion by AG blocked demixing when added before crowding (not shown) and  
94 reversed it when added after crowding, so demixing depended on glycogen (Fig 2C).

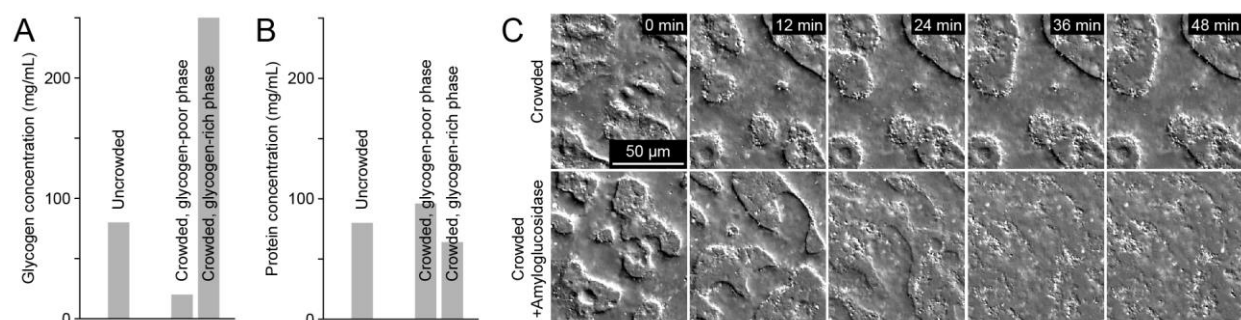

**Figure 2. Role of glycogen in demixing.** (A) Glycogen highly partitioned between the phases, as measured by a colorimetric assay. The concentration of glycogen in uncrowded extract was 80 mg/mL. In crowded extracts, the glycogen concentration was 20 mg/mL in the less dense phase and 250 mg/mL in the denser phase. (B) The less dense, glycogen-depleted phase had a higher protein concentration than the denser, glycogen-enriched phase. (C) DIC images. Top row: Control crowded extract remained demixed. Bottom row: Addition of amyloglucosidase (AG) after demixing caused the phases to dissolve and the system to return to a single phase.

### 95 **Ultrastructure of glycogen-enriched (G) and -depleted (R) phases**

96 Thin-section electron microscopy with conventional heavy metal staining was used to probe the  
97 ultrastructure of the phases. Uncrowded crude extracts appeared mottled with uniformly distributed  
98 mitochondria and ER (Fig 3A). Crowded extracts exhibited at least two major phases as in optical  
99 micrographs (Fig 3B). One of the phases had higher electron density than the other (Fig 3B). To identify  
100 the phases in electron micrographs, the phases were isolated in bulk by centrifugation then imaged  
101 separately (Methods). The glycogen-depleted phase (Fig 3C) had higher electron density than the  
102 glycogen-enriched phase (Fig 3D). Mitochondria concentrated at the interface between the phases (Fig  
103 3B,E) and were also present within the glycogen-depleted phase (Fig 3C). The higher electron density,  
104 glycogen-depleted phase was textured with structures  $\sim 25$  nm in diameter, which we interpret as  
105 ribosomes (Fig 3E''). Hereafter, we refer to the glycogen-depleted phase as "R" for ribosomes and the  
106 glycogen-enriched phase as "G" for glycogen.

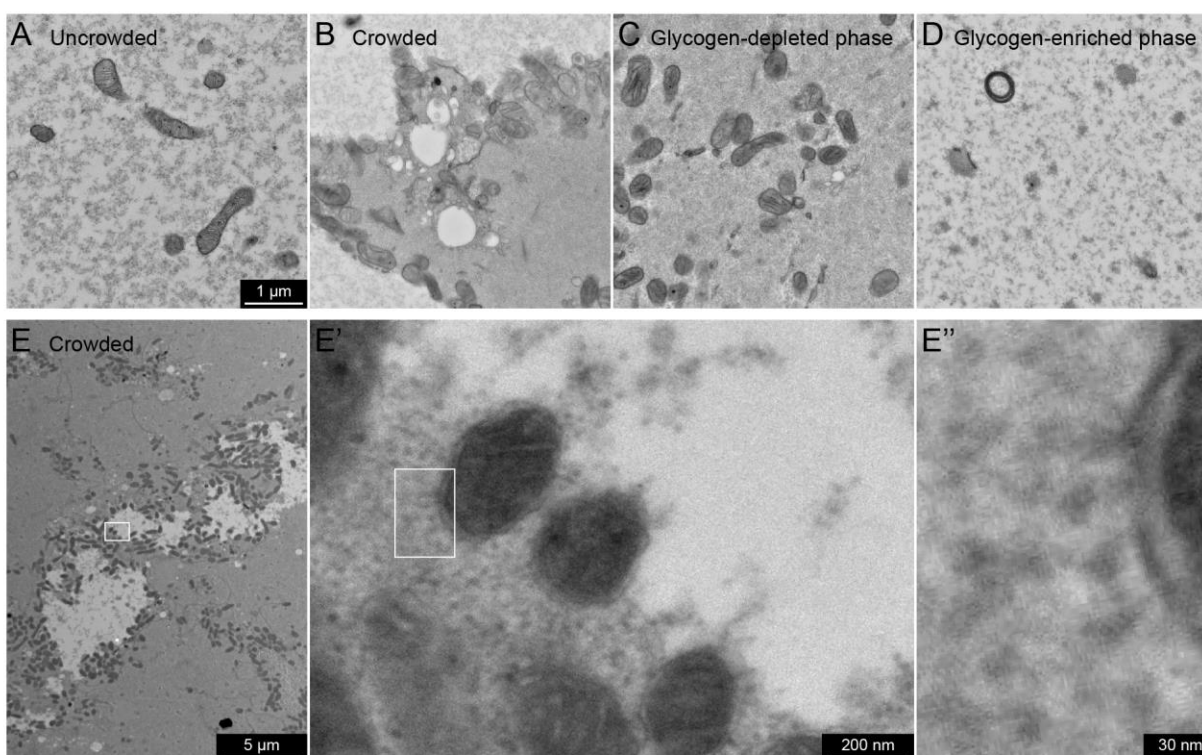

**Figure 3. Ultrastructure of glycogen-enriched (G) and -depleted (R) phases.** (A) Uncrowded crude extract did not exhibit bulk demixing but exhibited a mottled appearance. (B) Crowded extracts exhibited bulk demixing, with one phase higher electron density than the other. (C,D) The glycogen-depleted and glycogen-enriched phases were isolated from one another in bulk by centrifugation and imaged separately. The glycogen-depleted phase was higher electron density than the glycogen-enriched phase. (E) Mitochondria often localized along the interface between the phases or in the higher contrast phase. E' is a zoom of the box in panel E, and E'' is a zoom of the box in panel E'. The higher contrast phase had a granular appearance with features  $\sim 25$  nm in diameter, which we interpret as ribosomes.

107 **Fluorescent probes partitioned between G and R phases**

108 Fluorescence microscopy provided a convenient method to observe the two phases and estimate the  
109 partition coefficient of macromolecules. Fluorescent probes such as EB1-mApple (57 kDa) and  
110 Streptavidin (53 kDa) labeled with Alexa Fluor 647 were added to crowded extracts. Then, to estimate  
111 partitioning of each probe between the phases, the G and R phases were isolated from one another in  
112 bulk by centrifugation (Methods). We could thus estimate the partition coefficients of the fluorescent  
113 probes (Fig 4A,B), as well as identify the mixed phases using the fluorescent probes (Fig 4C). Partition  
114 coefficients in mixed phases were similar to those in bulk (Fig 4D). Most probes partitioned preferentially  
115 into the R phase, including EB1-GFP (57 kDa), Fab fragment antibody (50 kDa) labeled with Alexa Fluor  
116 647, and 70 kDa dextran-Alexa Fluor 488 (Fig 4E-G, I-J). Glycogen phosphorylase A (PYGL, 188 kDa as  
117 dimer), a glycogen-binding protein, labeled with Pacific Blue partitioned preferentially into the G phase  
118 (Fig 4K). Mitochondria imaged by NADH autofluorescence localized along the interface between phases  
119 (Fig 4H), as seen by electron micrographs (Fig 3B,E).



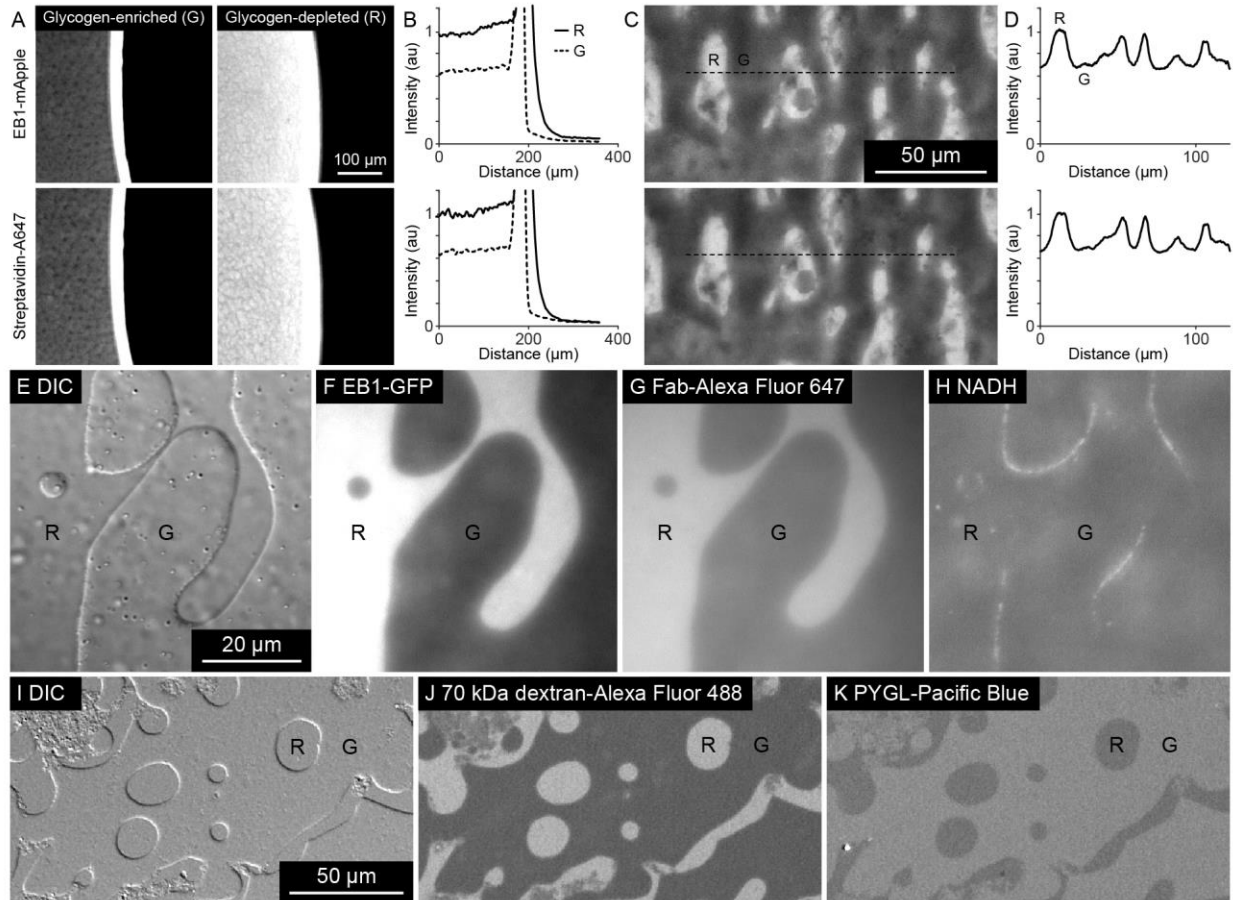

**Figure 4. Fluorescent probes partitioned between G and R phases.** (A) EB1-mApple and Streptavidin-A647 in G and R phases, isolated from one another in bulk by centrifugation. (B) Both probes partitioned preferentially into the R phase than the G phase. (C) Mixed phases in crowded extract. (D) Intensity profile along the black dotted lines overlaid on panel C. (E-H) EB1-GFP and Fab-Alexa Fluor 647 likewise partitioned preferentially into the R phase, while mitochondria imaged by NADH autofluorescence localized along the interface between phases, as seen by electron micrographs. (I-K) 70 kDa dextran-Alexa Fluor 488 partitioned into the R phase, while PYGL-Pacific Blue partitioned into the G phase.

120 **Protein partitioning depends on glycogen binding and native molecular weight (MW)**

121 To quantify the proteomes of the G and R phases, we performed multiplexed mass spectrometry analysis  
122 using the MultiNotch MS3 method (Gupta et al., 2018; McAlister et al., 2014; Sonnett et al., 2018). For  
123 this analysis, we compared two methods for crowding the extract, using either Sephadex G-25 resin or 30  
124 kDa MWCO centrifugal filter units. Results were similar for the two methods (Fig S2, Table S1). Fig 5  
125 reports measurements averaged across the two methods and several repeats.

126  
127 Known glycogen-binding proteins partitioned into the G phase, with log base 2 partition coefficients of 1-  
128 3 (Fig 5A). These values approach the partition coefficient of glycogen itself (Fig 2A). Ribosomal subunits,  
129 ER and mitochondrial proteins selectively partitioned into the R phase (Fig 5A), consistent with the  
130 electron micrographs (Fig 3C,E). Enzymes involved in carbohydrate metabolism also partitioned into the  
131 G phase, though with lower partition coefficients than proteins known to bind glycogen (Fig 5A). Several  
132 of the highest native MW protein complexes other than ribosomes partitioned into the G phase, such as  
133 major vault protein (MVP, 13 MDa), ferritin (FTH1, 450 kDa), chaperonin-containing T-complex (CCT, 960  
134 kDa), and the 26S proteasome (PSMA, 2 MDa) (Fig 5A). We then plotted log base 2 partition coefficients  
135 with respect to native MW (Fig 5B), based on previous estimates of native MW with an upper bound of  
136 256 kDa (Wühr et al., 2015). Proteins with native MW smaller than 100 kDa had a slight preference for  
137 the G phase, with average log base 2 partition coefficient  $0.4 \pm 0.8$  (Fig 5C). In contrast, most proteins with  
138 native MW greater than 256 kDa partitioned into the R phase, with average log base 2 partition coefficient  
139  $-1.3 \pm 1.6$  (Fig 5C).

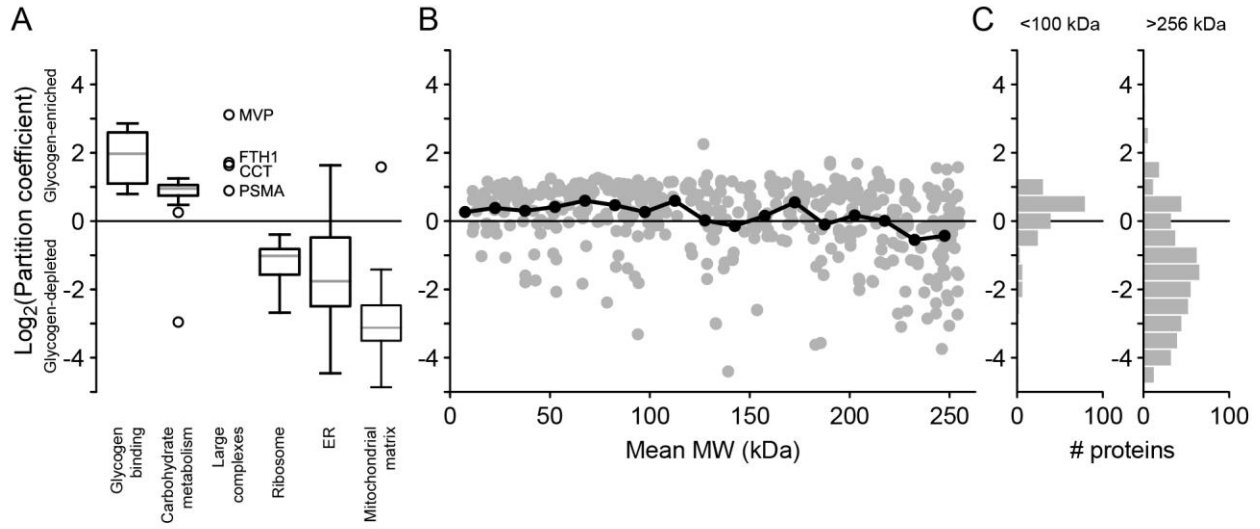

**Figure 5. Proteomics analysis suggests partitioning depends on binding and native MW.** (A) Log base 2 partition coefficients of proteins sorted by Gene Ontology terms. Gray lines represent median values, boxes represent first and third quartile values, whiskers show the range of the data up to 1.5x the interquartile range, and circles represent outliers. (B) Log base 2 partition coefficients with respect to native MW less than 256 kDa. (C) Log base 2 partition coefficients of all proteins in complexes with native MW less than 100 kDa or greater than 256 kDa. Replicates in Figure S2.

## Discussion

140 When macromolecular crowding of *Xenopus* egg extracts was increased 1.4x over control, we observed  
141 glycogen-dependent demixing into liquid G and R phases that were enriched in glycogen and ribosomes,  
142 respectively. This was unexpected, since reports from other systems led us to expect a transition to a  
143 glass-like state. We suspect liquid-liquid demixing is promoted by the high glycogen concentration in egg  
144 cytoplasm, which is comparable to that in hepatocytes from fed liver.

145  
146 Mass spec analysis suggested both binding and native MW contributed to partitioning of proteins  
147 between the phases. In terms of binding, glycogen-binding proteins partitioned preferentially into the G  
148 phase with an average partition coefficient similar to that of glycogen itself (Fig 5A). Enzymes involved in  
149 carbohydrate metabolism also partitioned into the G phase (Fig 5A). These spanned a range of native MWs  
150 from 33 to 241 kDa, with no apparent correlation between partition coefficient and native MW (Table S1).  
151 Some of these have been shown to bind glycogen in an adipocyte glycogen proteome (Stapleton et al.,  
152 2013; Stapleton et al., 2010). Association between glycolytic enzymes has also been reported, but its  
153 functional significance remains unclear (Schmitt and An, 2017). Consistent with a role for native MW, the  
154 G phase enriched several especially large protein complexes not known to bind glycogen (Stapleton et al.,  
155 2013; Stapleton et al., 2010) (Fig 5A). Relative contributions of binding and entropic considerations may  
156 be considered within excluded volume theory (Rivas and Minton, 2016).

157  
158 Frog eggs evolved in a freshwater environment and *Xenopus* eggs are not known to exhibit desiccation  
159 resistance. Thus, the demixing we observed is unlikely to be of direct physiological relevance; however, it  
160 may provide clues to glycogen organization in tissue cells. Glycogen particles often appear as aggregates  
161 in multiple animal tissues (Coimbra and Leblond, 1966; Galavazi, 1971; Porter and Bruni, 1959; Revel,  
162 1964; Revel et al., 1960; Sheldon et al., 1962) and chloroplasts (Crumpton-Taylor et al., 2012; Kasperbauer  
163 and Hamilton, 1984). Fawcett (1981) summarized extensive EM studies as showing that “glycogen is  
164 seldom uniformly distributed in the cytoplasm but tends to accumulate in dense regional deposits.” Our  
165 results suggest that physical demixing may contribute to high local concentrations of glycogen, though we  
166 cannot rule out other mechanisms including binding interactions between glycogen particles and local  
167 concentration of biosynthetic enzymes.

168  
169 Our observations are also relevant to *Xenopus* egg extract technical considerations. Concentration of  
170 extract using 100 kDa filtration units was shown to increase the stability of extracts to freeze-thaw cycles

171 (Takagi and Shimamoto, 2017). Those authors used ~1.2x crowding, which is just below the concentration  
172 factor needed for demixing. Exploration in the crowded but still mixed regime may facilitate study of the  
173 effect of crowding on biochemical processes. Recent work examined how crowding affects microtubule  
174 polymerization using osmotic perturbation of fission yeast (Molines et al., 2020). It will be interesting to  
175 ask similar questions in cytoplasmic extracts.

## Materials and Methods

### 176 *Preparation of Xenopus egg extracts*

177 *Xenopus* egg extracts were prepared as described previously (Field et al., 2017). Most experiments used  
178 extracts prepared with Cytochalasin D to prevent F-actin polymerization, in which case 100 µg/mL  
179 Cytochalasin D was added before the crushing spin at 18 °C, and 10 µg/mL Cytochalasin D was added after  
180 the crushing spin. Extracts with intact F-actin also demixed at similar crowding factors.

181

### 182 *Crowding of Xenopus egg extracts*

183 *Xenopus* egg extracts were crowded by two methods, using Sephadex G-25 resin or 30 kDa MWCO filter  
184 units, which gave similar results. To crowd using coarse Sephadex G-25 gel filtration resin (Sigma-Aldrich  
185 Cat#GE17-0034-01), 30 µg dry resin was added to 150 µL extracts in a PCR tube. The resin was submerged  
186 and dispersed with a pipette tip, then the slurry was incubated for 5 min on ice. Then several holes were  
187 punched in the bottom of the PCR tube using the tip of a 27G needle, which makes holes small enough to  
188 retain resin in the tube. Then the PCR tube was placed inside a 0.5 mL tube, which was in turn placed  
189 inside a 1.5 mL tube for centrifugation. The tubes were centrifuged at 4000 rcf for 4 min to collect the  
190 crowded extract in the 0.5 mL tubes. To crowd using filter units, extracts were centrifuged in Amicon filter  
191 units with 30 kDa MWCO (Millipore #UFC5030BK). Crowded extracts were then stored on ice. To estimate  
192 crowding factors, macromolecular fluorescent probes were added to extracts before crowding.

193

### 194 *Fluorescent probes*

195 To observe the two phases and estimate partitioning of fluorescent probes, we imaged Fab fragment  
196 antibody labeled with Alexa Fluor 647 (Jackson ImmunoResearch #111-607-003), Streptavidin labeled  
197 with Alexa Fluor 647 (Jackson ImmunoResearch #016-600-084), and Phosphorylase A (Sigma-Aldrich  
198 #P1261) labeled with Pacific Blue (Thermo Fisher #P10163).

199

### 200 *Digestion of glycogen*

201 Amyloglucosidase (AG) (Sigma-Aldrich #A7420) was added to extracts to a final concentration of 1.25  
202 mg/mL (8.7 µM).

203

204 *Measurement of glycogen concentration*

205 The glycogen concentration was measured by a colorimetric assay based on the peroxidase sensitive dye  
206 3,3',5,5'-tetramethylbenzidine (TMB) (Sigma-Aldrich #860336). Glycogen was digested to glucose using  
207 amyloglucosidase (AG), then hydrogen peroxide was generated from glucose using glucose oxidase  
208 (Sigma-Aldrich #G7016), then TMB was oxidized to TMB diimine by the hydrogen peroxide with  
209 horseradish peroxidase (Sigma-Aldrich #P6782). In particular, reactions included 100 µg/mL TMB, 250  
210 µg/mL AG, 250 µg/mL GO, 125 µg/mL HRP in 100 mM sodium citrate pH 5.0. Extracts and glycogen  
211 standards were titrated into reactions, and the TMB diimine absorbance at 660 nm was measured on a  
212 Synergy H1 plate reader (BioTek).

213

214 *Measurement of protein concentration*

215 Protein concentration in each phase was measured by Micro BCA following TCA precipitation.

216

217 *Isolation of phases by centrifugation*

218 Crowded extracts were centrifuged at 20000 rcf for 20 min. After centrifugation, the less dense R phase  
219 was aspirated into an 18 G blunt needle, carefully as not to disturb the interface between the R and G  
220 phases. The R phase appeared as two opaque layers of slightly different colors and both these were  
221 included in the R sample. Then a hole was punched in the bottom of the tube, and by pressing the top of  
222 the tube, the higher density G phase was pushed through the hole, likewise carefully as to avoid the  
223 interface between the phases.

224

225 *Electron microscopy*

226 Extract was spread on coverslips then samples were prepared by standard methods. Extract samples were  
227 fixed with 1.5% glutaraldehyde in 0.1 M cacodylate buffer pH 7.4, post fixed with 1% osmium  
228 tetroxide/potassium ferrocyanide, en block stained with 1% uranyl acetate, dehydrated and embedded in  
229 Epon Araldite, then sectioned and on grid stained with uranyl acetate and lead citrate. Samples were  
230 viewed on a Tecnai G-2 BioTwin electron microscope and imaged with an AMT CCD camera.

231

232 *Mass spectrometry*

233 Samples were denatured in 5 M guanidine thiocyanate, 5 mM dithiothreitol (DTT) (US Biological #D8070)  
234 for 10 min at 60 °C, then cysteines were alkylated with N-ethylmaleimide (NEM). The eluate was  
235 precipitated with trichloroacetic acid then subjected to proteolysis followed by the MultiNotch MS3

236 method as described (Gupta et al., 2018; McAlister et al., 2014; Sonnett et al., 2018), with channels  
237 normalized by the total number of counts. Native MWs were based on previous estimates (Wühr et al.,  
238 2015). Gene Ontology terms used for Fig 5A were Glycogen binding: GO:0005978 (Glycogen biosynthetic  
239 process, BP) and GO:0005980 (Glycogen catabolic process, BP); Carbohydrate metabolism: GO:0005975  
240 (Carbohydrate metabolic process, BP) excluding GO:0005978 (Glycogen biosynthetic process, BP),  
241 GO:0005980 (Glycogen catabolic process, BP), GO:0005739 (Mitochondrion, CC), and GO:0005759  
242 (Mitochondrial matrix, CC); Ribosome: GO:0005840 (Ribosome, CC); ER: GO:0005783 (Endoplasmic  
243 reticulum, CC); and Mitochondria matrix: GO:0005759 (Mitochondrial matrix, CC) excluding GO:0005829  
244 (Cytosol, CC).

## Acknowledgements

245 This work was supported by NIH grants R35GM131753 (TJM) and R35GM128813 (MW), and MBL  
246 fellowships from the Evans Foundation, MBL Associates, and the Colwin Fund (TJM and CMF). JFP was  
247 supported by the Fannie and John Hertz Foundation, the Fakhri lab at MIT, the MIT Department of Physics,  
248 and the MIT Center for Bits and Atoms. The authors thank Keisuke Ishihara for critical feedback on the  
249 manuscript, the Nikon Imaging Center at Harvard Medical School and Nikon at MBL for imaging support,  
250 and the National Xenopus Resource at MBL for support. The EB1-GFP construct was a gift from Kevin Slep  
251 (UNC Chapel Hill, NC).



## References

- Andre, A.A.M., and Spruijt, E. (2020). Liquid-liquid phase separation in crowded environments. *Int J Mol Sci* **21**.
- Charras, G.T., Mitchison, T.J., and Mahadevan, L. (2009). Animal cell hydraulics. *J Cell Sci* **122**, 3233-3241.
- Coimbra, A., and Leblond, C.P. (1966). Sites of glycogen synthesis in rat liver cells as shown by electron microscope radioautography after administration of glucose-H<sup>3</sup>. *J Cell Biol* **30**, 151-175.
- Crumpton-Taylor, M., Grandison, S., Png, K.M., Bushby, A.J., and Smith, A.M. (2012). Control of starch granule numbers in *Arabidopsis* chloroplasts. *Plant Physiol* **158**, 905-916.
- Delarue, M., Brittingham, G.P., Pfeffer, S., Surovtsev, I.V., Pinglay, S., Kennedy, K.J., Schaffer, M., Gutierrez, J.I., Sang, D., Poterewicz, G., *et al.* (2018). mTORC1 controls phase separation and the biophysical properties of the cytoplasm by tuning crowding. *Cell* **174**, 338-349 e320.
- Dill, K.A., Ghosh, K., and Schmit, J.D. (2011). Physical limits of cells and proteomes. *Proc Natl Acad Sci U S A* **108**, 17876-17882.
- Dowler, V.B., and Mottram, V.H. (1918). The distribution of blood, glycogen and fat in the lobes of the liver. *J Physiol* **52**, 166-174.
- Fawcett, D.W. (1981). *The Cell*.
- Field, C.M., Pelletier, J.F., and Mitchison, T.J. (2017). *Xenopus* extract approaches to studying microtubule organization and signaling in cytokinesis. *Methods Cell Biol* **137**, 395-435.
- Galavazi, G. (1971). Identification of helical polyribosomes in sections of mature skeletal muscle fibers. *Z Zellforsch Mikrosk Anat* **121**, 531-547.
- Groen, A.C., Coughlin, M., and Mitchison, T.J. (2011). Microtubule assembly in meiotic extract requires glycogen. *Mol Biol Cell* **22**, 3139-3151.
- Gupta, M., Sonnett, M., Ryazanova, L., Presler, M., and Wuhr, M. (2018). Quantitative proteomics of *Xenopus* embryos I, Sample preparation. *Methods Mol Biol* **1865**, 175-194.
- Hartl, P., Olson, E., Dang, T., and Forbes, D.J. (1994). Nuclear assembly with lambda DNA in fractionated *Xenopus* egg extracts: an unexpected role for glycogen in formation of a higher order chromatin intermediate. *J Cell Biol* **124**, 235-248.
- Hwang, J., Kim, J., and Sung, B.J. (2016). Dynamics of highly polydisperse colloidal suspensions as a model system for bacterial cytoplasm. *Phys Rev E* **94**, 022614.
- Hyman, A.A., Weber, C.A., and Julicher, F. (2014). Liquid-liquid phase separation in biology. *Annu Rev Cell Dev Biol* **30**, 39-58.
- Ioan, C.E., Aberle, T., and Burchard, W. (1999a). Solution properties of glycogen. 1. Dilute solutions. *Macromolecules* **32**, 7444-7453.
- Ioan, C.E., Aberle, T., and Burchard, W. (1999b). Solution properties of glycogen. 2. Semidilute solutions. *Macromolecules* **32**, 8655-8662.
- Joyner, R.P., Tang, J.H., Helenius, J., Dultz, E., Brune, C., Holt, L.J., Huet, S., Muller, D.J., and Weis, K. (2016). A glucose-starvation response regulates the diffusion of macromolecules. *Elife* **5**.
- Kasperbauer, M.J., and Hamilton, J.L. (1984). Chloroplast structure and starch grain accumulation in leaves that received different red and far-red levels during development. *Plant Physiol* **74**, 967-970.
- Kim, J.S., and Yethiraj, A. (2009). Effect of macromolecular crowding on reaction rates: A computational and theoretical study. *Biophys J* **96**, 1333-1340.

- McAlister, G.C., Nusinow, D.P., Jedrychowski, M.P., Wuhr, M., Huttlin, E.L., Erickson, B.K., Rad, R., Haas, W., and Gygi, S.P. (2014). MultiNotch MS3 enables accurate, sensitive, and multiplexed detection of differential expression across cancer cell line proteomes. *Anal Chem* *86*, 7150-7158.
- Mitchison, T.J. (2019). Colloid osmotic parameterization and measurement of subcellular crowding. *Mol Biol Cell* *30*, 173-180.
- Molines, A.T., Lemièrre, J., Edrington, C.H., Hsu, C.-T., Steinmark, I.E., Suhling, K., Goshima, G., Holt, L.J., Brouhard, G., and Chang, F. (2020). Physical properties of the cytoplasm modulate the rates of microtubule growth and shrinkage. *bioRxiv*.
- Munder, M.C., Midtvedt, D., Franzmann, T., Nuske, E., Otto, O., Herbig, M., Ulbricht, E., Müller, P., Taubenberger, A., Maharana, S., *et al.* (2016). A pH-driven transition of the cytoplasm from a fluid- to a solid-like state promotes entry into dormancy. *Elife* *5*.
- Nawaz, A., Zhang, P., Li, E., Gilbert, R.G., and Sullivan, M.A. (2021). The importance of glycogen molecular structure for blood glucose control. *iScience* *24*, 101953.
- Okumus, B., Landgraf, D., Lai, G.C., Bakshi, S., Arias-Castro, J.C., Yildiz, S., Huh, D., Fernandez-Lopez, R., Peterson, C.N., Toprak, E., *et al.* (2016). Mechanical slowing-down of cytoplasmic diffusion allows in vivo counting of proteins in individual cells. *Nat Commun* *7*, 11641.
- Parry, B.R., Surovtsev, I.V., Cabeen, M.T., O'Hern, C.S., Dufresne, E.R., and Jacobs-Wagner, C. (2014). The bacterial cytoplasm has glass-like properties and is fluidized by metabolic activity. *Cell* *156*, 183-194.
- Porter, K.R., and Bruni, C. (1959). An electron microscope study of the early effects of 3'-Me-DAB on rat liver cells. *Cancer Res* *19*, 997-1009.
- Prats, C., Graham, T.E., and Shearer, J. (2018). The dynamic life of the glycogen granule. *J Biol Chem* *293*, 7089-7098.
- Revel, J.P. (1964). Electron microscopy of glycogen. *J Histochem Cytochem* *12*, 104-114.
- Revel, J.P., Napolitano, L., and Fawcett, D.W. (1960). Identification of glycogen in electron micrographs of thin tissue sections. *J Biophys Biochem Cytol* *8*, 575-589.
- Rivas, G., and Minton, A.P. (2016). Macromolecular crowding in vitro, in vivo, and in between. *Trends Biochem Sci* *41*, 970-981.
- Schmitt, D.L., and An, S. (2017). Spatial organization of metabolic enzyme complexes in cells. *Biochemistry* *56*, 3184-3196.
- Sheldon, H., Silverberg, M., and Kerner, I. (1962). On the differing appearance of intranuclear and cytoplasmic glycogen in liver cells in glycogen storage disease. *J Cell Biol* *13*, 468-473.
- Sonnett, M., Gupta, M., Nguyen, T., and Wuhr, M. (2018). Quantitative proteomics for *Xenopus* embryos II, Data analysis. *Methods Mol Biol* *1865*, 195-215.
- Stapleton, D., Nelson, C., Parsawar, K., Flores-Opazo, M., McClain, D., and Parker, G. (2013). The 3T3-L1 adipocyte glycogen proteome. *Proteome Sci* *11*, 11.
- Stapleton, D., Nelson, C., Parsawar, K., McClain, D., Gilbert-Wilson, R., Barker, E., Rudd, B., Brown, K., Hendrix, W., O'Donnell, P., *et al.* (2010). Analysis of hepatic glycogen-associated proteins. *Proteomics* *10*, 2320-2329.
- Takagi, J., and Shimamoto, Y. (2017). High-quality frozen extracts of *Xenopus laevis* eggs reveal size-dependent control of metaphase spindle micromechanics. *Mol Biol Cell* *28*, 2170-2177.
- van den Berg, J., Boersma, A.J., and Poolman, B. (2017). Microorganisms maintain crowding homeostasis. *Nat Rev Microbiol* *15*, 309-318.
- Wühr, M., Guttler, T., Peshkin, L., McAlister, G.C., Sonnett, M., Ishihara, K., Groen, A.C., Presler, M., Erickson, B.K., Mitchison, T.J., *et al.* (2015). The nuclear proteome of a vertebrate. *Curr Biol* *25*, 2663-2671.

## Supplementary figures

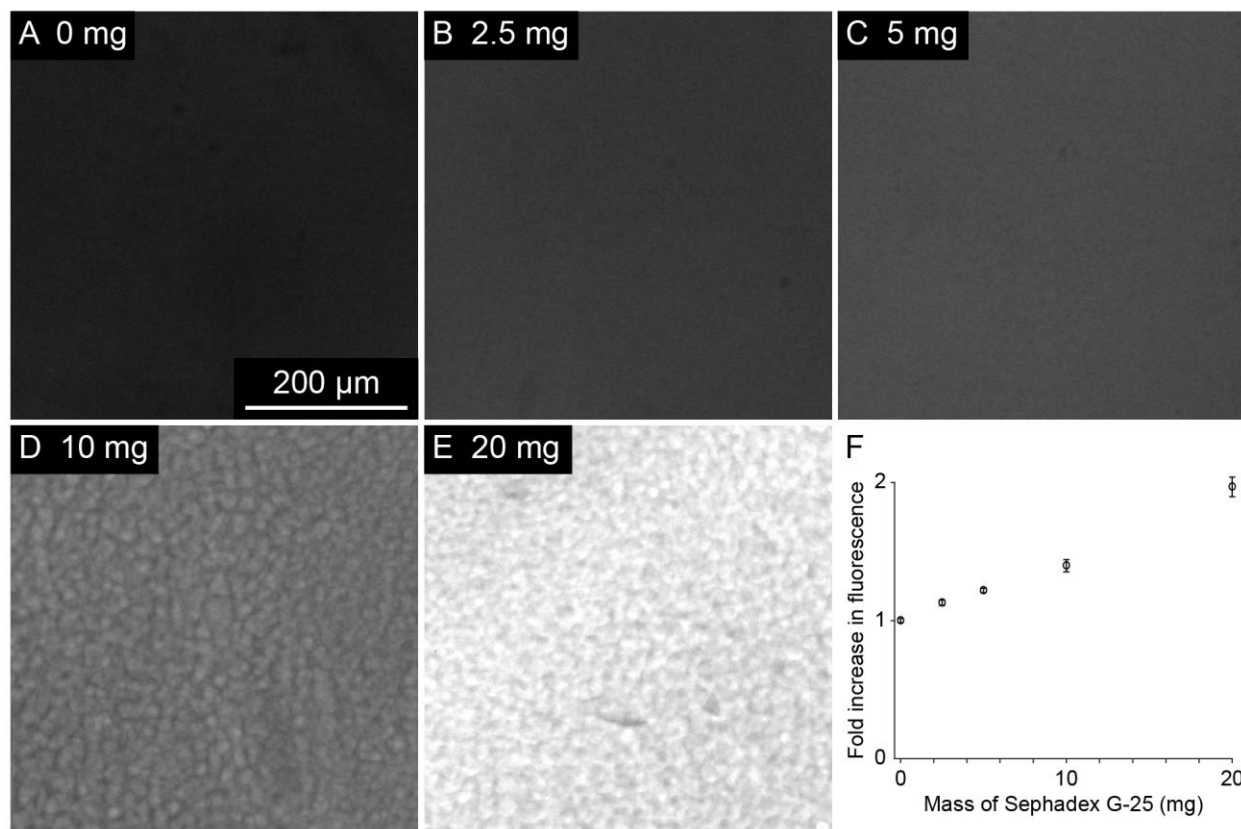

**Figure S1. Estimation of crowding factors by measuring fold increase in fluorescence of a macromolecular probe.** (Related to Fig 1B) (A-E) Streptavidin-Alexa Fluor 647 was added to extract, then the extract was split into 60 μL volumes. To vary the crowding factor, different amounts of dry Sephadex G-25 resin were added to each volume. After crowded extracts were collected (Methods), samples of fixed depth were prepared and imaged by fluorescence microscopy with a low magnification objective. (F) Fold increase in fluorescence with respect to mass of dry Sephadex G-25 resin per 60 μL extract. Error bars represent standard deviation of pixel intensity values.

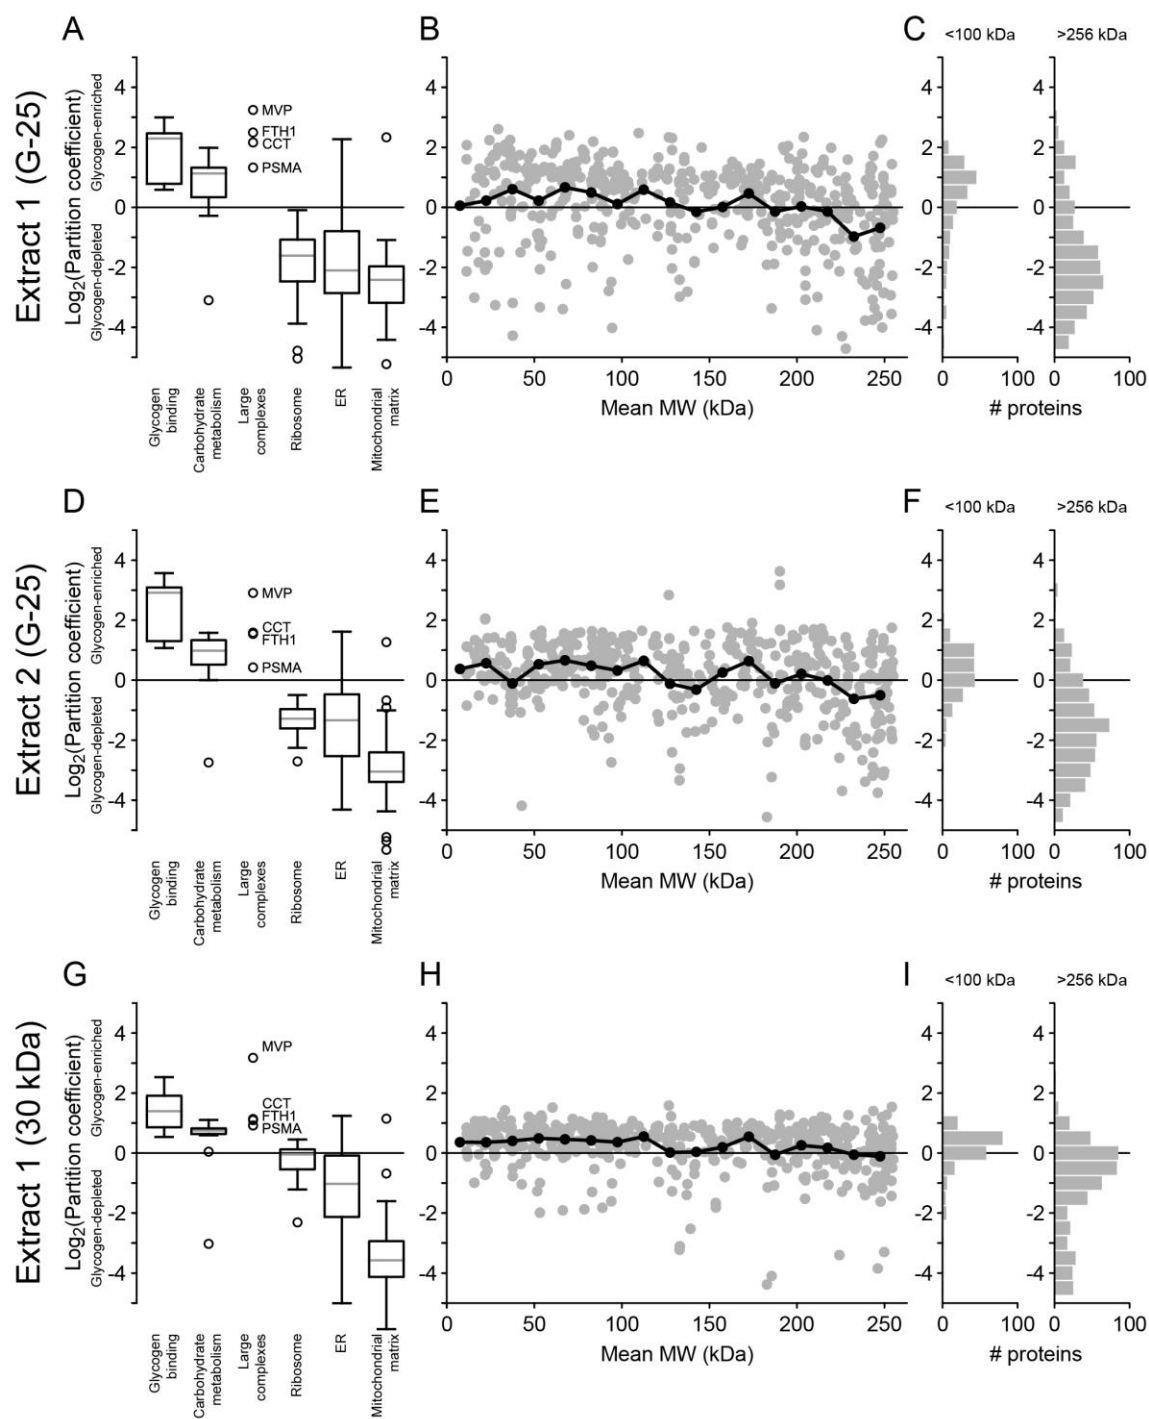

**Figure S2. Replicate proteomics analyses suggest partitioning depends on binding and native MW.** (Related to Fig 5) Extracts were crowded by two methods: (A-F) Sephadex G-25 gel filtration resin or (G-I) 30 kDa MWCO centrifugal filter unit. (A,D,G) Log base 2 partition coefficients of proteins sorted by Gene Ontology terms. Gray lines represent median values, boxes represent first and third quartile values, whiskers show the range of the data up to 1.5x the interquartile range, and circles represent outliers. (B,E,H) Log base 2 partition coefficients with respect to native MW less than 256 kDa. (C,F,I) Log base 2 partition coefficients of all proteins with native MW less than 100 kDa or greater than 256 kDa.

**Video S1. Liquid behavior of phases.** (Related to Fig 1D) 1.4x crowded extract was confined between coverslips then imaged immediately to observe spreading flow. Both phases exhibited liquid behavior, including deformation under flow, splitting, fusion, and rounding by surface tension. Extract was imaged by differential interference contrast (DIC) microscopy with a 20x objective.

**Table S1. Full proteomics data.** (Related to Figs 5, S2).
